# Supplementary material for: Molecular detection of Mycobacterium tuberculosis from buccal swabs among adult in Peru
Source: PubMed Central journal article supplement (PMC7746708; doi:10.1038/s41598-020-79297-9), 2020-12-17
Supplement: 41598_2020_79297_MOESM1_ESM.pdf [file 41598_2020_79297_MOESM1_ESM.pdf]

## Supplementary Information

### Article title:

Molecular detection of *Mycobacterium tuberculosis* from buccal swabs among adult in Peru

### Authors:

Annelies W Mesman<sup>1\*</sup>, Roger I Calderon<sup>2,3</sup>, Nira R Pollock<sup>4</sup>, Martín Soto<sup>2</sup>, Milagros Mendoza<sup>2</sup>, Julia Coit<sup>1</sup>, Zibiao Zhang<sup>1</sup>, Juan Aliaga<sup>2</sup>, Leonid Lecca<sup>2</sup>, Rebecca C Holmberg<sup>5</sup>, Molly F Franke<sup>1</sup>

<sup>1</sup> Department of Global Health and Social Medicine, Harvard Medical School, Boston, USA

<sup>2</sup> Socios En Salud Sucursal (Partners In Health), Lima, Peru

<sup>3</sup> Programa Acadêmico de Tuberculose. Faculdade de Medicina. Universidade Federal do Rio de Janeiro, Rio de Janeiro 21941-590, Brazil

<sup>4</sup> Department of Laboratory Medicine, Boston Children's Hospital, Boston, USA,

<sup>5</sup> Akonni Biosystems Inc, Frederick, USA.

\*Corresponding author: [anneliesmesman@gmail.com](mailto:anneliesmesman@gmail.com)

**Supplementary Table S1.** Collection methods and results for the 13 patients whose buccal swab sample were collected with a combination of the OmniSwab and EasiCollect device.

| Patient | Smear result | Sample 1    |          | Sample 2    |          | Sample 3    |          |
|---------|--------------|-------------|----------|-------------|----------|-------------|----------|
|         |              | Method      | Result   | Method      | Result   | Method      | Result   |
| 1       | -            | EasiCollect | Negative | OmniSwab    | Negative | EasiCollect | Negative |
| 2       | +++          | OmniSwab    | Positive | EasiCollect | Positive |             |          |
| 3       | -            | EasiCollect | Positive | EasiCollect | Negative | OmniSwab    | Negative |
| 4       | +            | OmniSwab    | Negative | EasiCollect | Negative | EasiCollect | Negative |
| 5       | +            | EasiCollect | Positive | OmniSwab    | Positive | EasiCollect | Negative |
| 6       | +            | OmniSwab    | Negative | EasiCollect | Negative | EasiCollect | Negative |
| 7       | +            | EasiCollect | Positive | EasiCollect | Positive | OmniSwab    | Negative |
| 8       | 1-9          | EasiCollect | Negative | OmniSwab    | Positive | EasiCollect | Negative |
| 9       | +            | OmniSwab    | Positive | EasiCollect | Negative | OmniSwab    | Negative |
| 10      | -            | EasiCollect | Negative | OmniSwab    | Positive | OmniSwab    | Negative |
| 11      | -            | EasiCollect | Negative | OmniSwab    | Positive | OmniSwab    | Negative |
| 12      | +            | EasiCollect | Negative | OmniSwab    | Positive | OmniSwab    | Negative |
| 13      | +++          | EasiCollect | Negative | OmniSwab    | Positive | OmniSwab    | Negative |
